# Supplementary material for: Exploring the bioactivity and antibacterial properties of silver and cerium co-doped borosilicate bioactive glass
Source: Royal Society of Chemistry journal article supplement (doi:10.1039/d4tb02416h), 2024-12-20
Supplement: d4tb02416h1.pdf [file d4tb02416h1.pdf]

## Exploring the Bioactivity and Antibacterial Properties of Silver and Cerium Co-Doped Borosilicate Bioactive Glass

Oluwatosin David ABODUNRIN\*, Khalil EL MABROUK\* and Meriame BRICHA

*° Euromed University of Fes, UEMF, Morocco.*

### Supplementary Materials

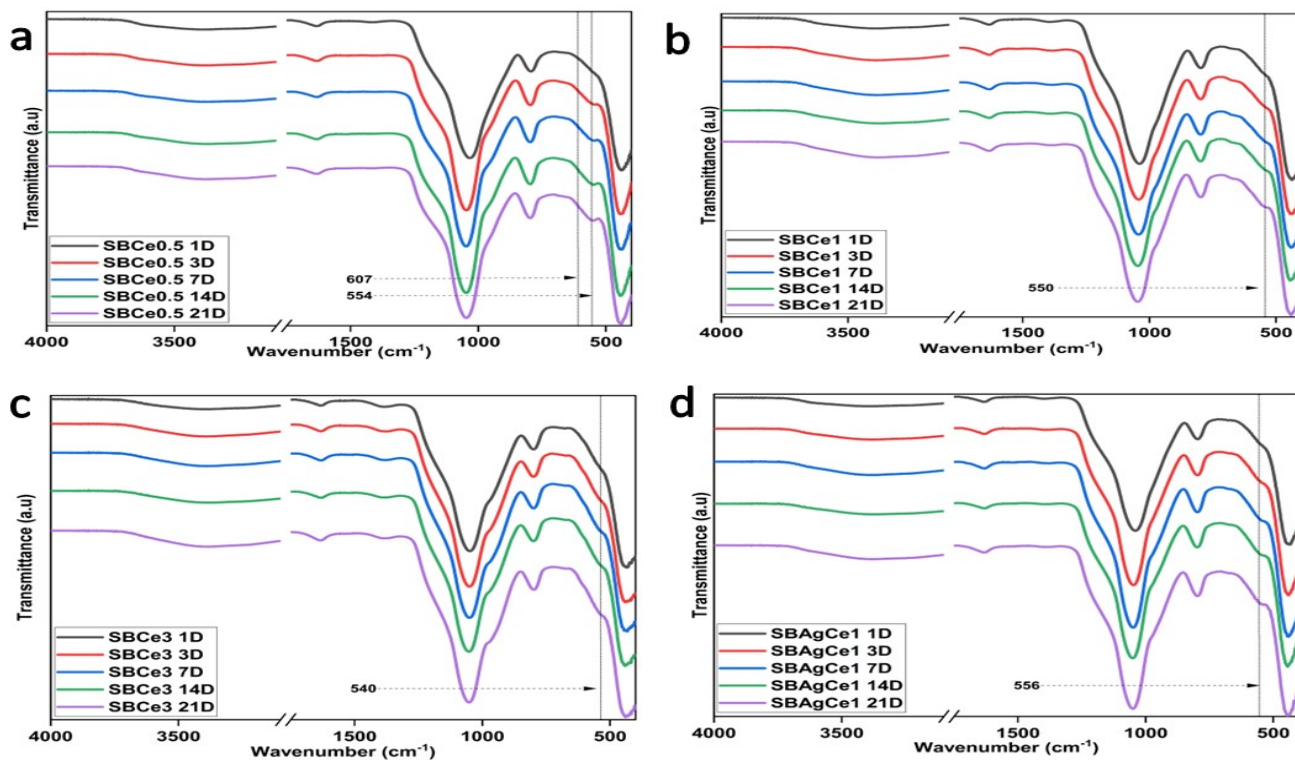

**Supplementary Figure 1.** FTIR spectra of Incubated doped BBGs for 1,3,7,14 and 21 days (a) SBCe0.5, (b) SBCe1, (c)SBCe3 and (d)SBAgCe1

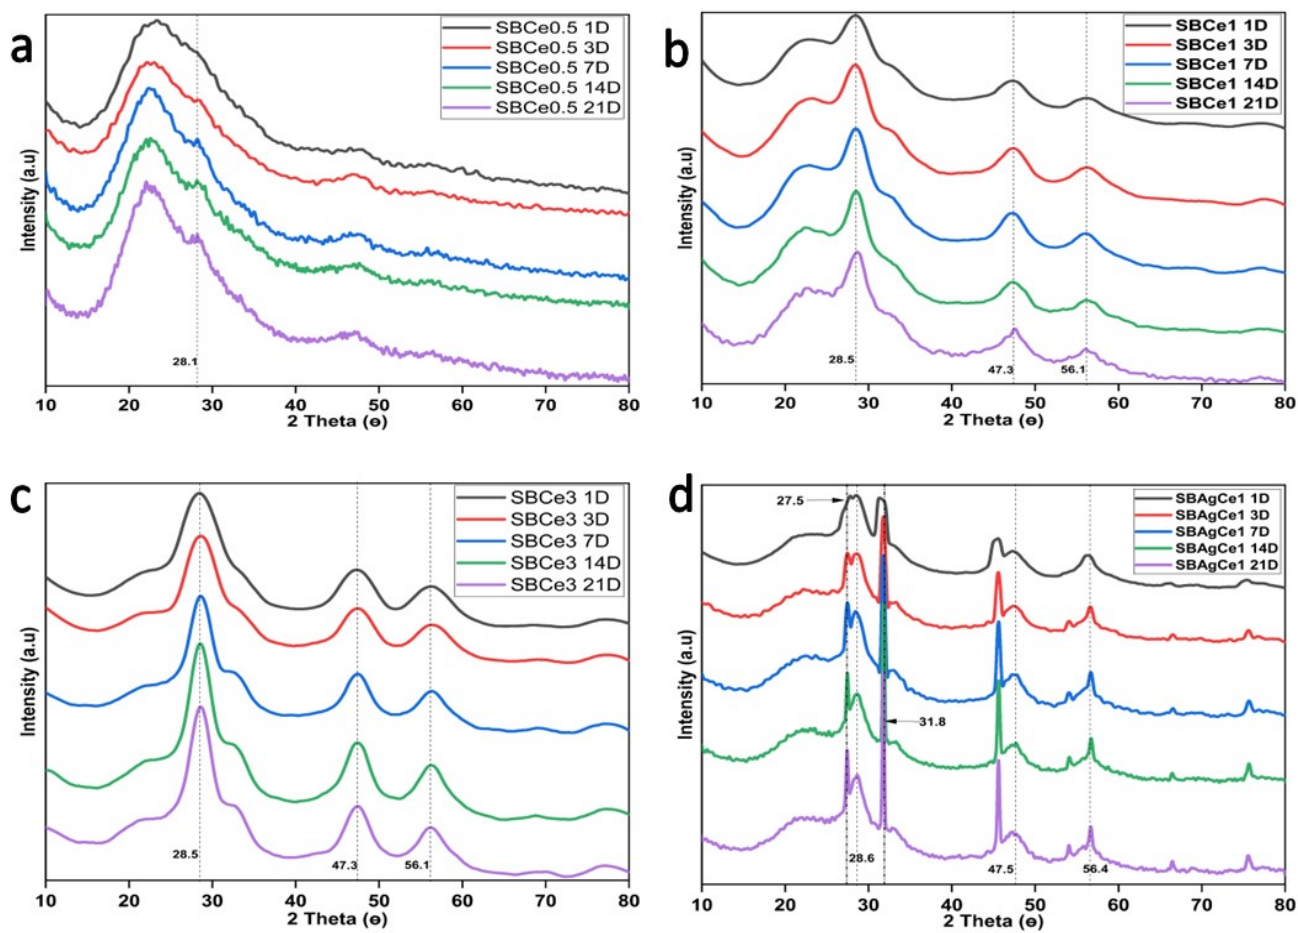

**Supplementary Figure 2.** XRD spectra of Incubated doped BGGs for 1,3,7,14 and 21 days (a) SBCE0.5, (b) SBCE1, (c) SBCE3 and (d) SBAgCe1
